# Supplementary material
Source: HighWire-hosted journal article supplement (https://erj.ersjournals.com/content/50/5/1701153)
Supplement: inline-supplementary-material-1 [file inline-supplementary-material-1.pdf]

# Respiratory adverse effects of opioids for breathlessness: a systematic review and meta-analysis

## Supplement: content

|                                                                                                |    |
|------------------------------------------------------------------------------------------------|----|
| TABLE S1a. Search strategy in Pubmed.....                                                      | 2  |
| TABLE S1b. Search strategy in Embase .....                                                     | 2  |
| TABLE S1c. Search strategy in CENTRAL.....                                                     | 3  |
| TABLE S1d. Search strategy in CINAHL.....                                                      | 3  |
| TABLE S1e. Search strategy in ClinicalTrials.gov .....                                         | 4  |
| TABLE S2. Patient characteristics, study design and results of observational studies .....     | 5  |
| TABLE S3. Patient characteristics and results of case reports .....                            | 7  |
| TABLE S4. Characteristics and study design of ongoing studies .....                            | 9  |
| TABLE S5. Risk of bias of randomized controlled trials.....                                    | 10 |
| TABLE S6. Risk of bias of non-randomized trials.....                                           | 11 |
| TABLE S7. Risk of bias of prospective observational studies .....                              | 12 |
| TABLE S8. Results of randomized controlled trials .....                                        | 13 |
| TABLE S9. Results of non-randomized trials .....                                               | 17 |
| FIGURE S1. Effect of opioid treatment in patients with advanced disease on breathlessness..... | 20 |
| References .....                                                                               | 21 |

| TABLE S1a. Search strategy in Pubmed |                                                                                                                                                                                                                                                                                                                                                                                                                                                                                                                                                                                                                                                                                                                                                                                                                                                                                                                                                                                                                                                                                                                                                                                                |
|--------------------------------------|------------------------------------------------------------------------------------------------------------------------------------------------------------------------------------------------------------------------------------------------------------------------------------------------------------------------------------------------------------------------------------------------------------------------------------------------------------------------------------------------------------------------------------------------------------------------------------------------------------------------------------------------------------------------------------------------------------------------------------------------------------------------------------------------------------------------------------------------------------------------------------------------------------------------------------------------------------------------------------------------------------------------------------------------------------------------------------------------------------------------------------------------------------------------------------------------|
| Breathlessness                       | <ol style="list-style-type: none"> <li>1. dyspnoea/drug therapy[Mesh Terms]</li> <li>2. dyspn*[Title/Abstract]</li> <li>3. breathless*[Title/Abstract]</li> <li>4. ((breath*[Title/Abstract]) AND labour*[Title/Abstract])</li> <li>5. ((short*[Title/Abstract]) AND breath*[Title/Abstract])</li> <li>6. breathing difficult*[Title/Abstract]</li> <li>7. 1 OR 2 OR 3 OR 4 OR 5 OR 6</li> </ol>                                                                                                                                                                                                                                                                                                                                                                                                                                                                                                                                                                                                                                                                                                                                                                                               |
| Opioid                               | <ol style="list-style-type: none"> <li>8. analgesics, opioid/adverse effects[Mesh Terms]</li> <li>9. analgesics, opioid/therapeutic use[Mesh Terms]</li> <li>10. opioid*[Title/Abstract]</li> <li>11. opiate*[Title/Abstract]</li> <li>12. codeine/adverse effects[Mesh Terms]</li> <li>13. codeine/therapeutic use[Mesh Terms]</li> <li>14. codeine[Title/Abstract]</li> <li>15. heroin/adverse effects[Mesh Terms]</li> <li>16. heroin/therapeutic use[Mesh Terms]</li> <li>17. diamorphine[Title/Abstract]</li> <li>18. fentanyl/adverse effects[Mesh Terms]</li> <li>19. fentanyl/therapeutic use[Mesh Terms]</li> <li>20. fentanyl[Title/Abstract]</li> <li>21. dihydrocodeine[Supplementary Concept]</li> <li>22. dihydrocodeine[Title/Abstract]</li> <li>23. morphine/adverse effects[Mesh Terms]</li> <li>24. morphine/therapeutic use[Mesh Terms]</li> <li>25. morphine[Title/Abstract]</li> <li>26. oxycodone/adverse effects[Mesh Terms]</li> <li>27. oxycodone/therapeutic use[Mesh Terms]</li> <li>28. oxycodone[Title/Abstract]</li> <li>29. 8 OR 9 OR 10 OR 11 OR 12 OR 13 OR 14 OR 15 OR 16 OR 17 OR 18 OR 19 OR 20 OR 21 OR 22 OR 23 OR 24 OR 25 OR 26 OR 27 OR 28</li> </ol> |
|                                      | 30. animals[Mesh Terms] NOT humans[Mesh Terms]                                                                                                                                                                                                                                                                                                                                                                                                                                                                                                                                                                                                                                                                                                                                                                                                                                                                                                                                                                                                                                                                                                                                                 |
|                                      | 31. (#7 AND #29) NOT #30                                                                                                                                                                                                                                                                                                                                                                                                                                                                                                                                                                                                                                                                                                                                                                                                                                                                                                                                                                                                                                                                                                                                                                       |
|                                      | 32. Limit #31 to article types case reports, clinical studies, clinical trials, comparative studies, multicentre studies, observational studies, randomized controlled trials.                                                                                                                                                                                                                                                                                                                                                                                                                                                                                                                                                                                                                                                                                                                                                                                                                                                                                                                                                                                                                 |

| TABLE S1b. Search strategy in Embase |                                                                                                                                                                                                                                                                                                                                                                                                                                                                                                                                                                             |
|--------------------------------------|-----------------------------------------------------------------------------------------------------------------------------------------------------------------------------------------------------------------------------------------------------------------------------------------------------------------------------------------------------------------------------------------------------------------------------------------------------------------------------------------------------------------------------------------------------------------------------|
| Breathlessness                       | <ol style="list-style-type: none"> <li>1. exp dyspnea/dt [Drug Therapy]</li> <li>2. dyspn*.mp [mp=title, abstract, heading word, drug trade name, original title, device manufacturer, drug manufacturer, device trade name, keyword]</li> <li>3. breathless*.mp</li> <li>4. "breath* labour*".mp</li> <li>5. "short* of breath*".mp</li> <li>6. "breath* difficult*".mp</li> <li>7. 1 OR 2 OR 3 OR 4 OR 5 OR 6</li> </ol>                                                                                                                                                  |
| Opioids                              | <ol style="list-style-type: none"> <li>8. exp opiate/ae, dt [Adverse Drug Reaction, Drug Therapy]</li> <li>9. opioid*.mp</li> <li>10. opiate*.mp</li> <li>11. exp codeine/ae, dt [Adverse Drug Reaction, Drug Therapy]</li> <li>12. codeine.mp</li> <li>13. exp diamorphine/ae, dt [Adverse Drug Reaction, Drug Therapy]</li> <li>14. diamorphine.mp</li> <li>15. exp fentanyl/ae, dt [Adverse Drug Reaction, Drug Therapy]</li> <li>16. fentanyl.mp</li> <li>17. exp dihydrocodeine/ae, dt [Adverse Drug Reaction, Drug Therapy]</li> <li>18. dihydrocodeine.mp</li> </ol> |

|  |                                                                                          |
|--|------------------------------------------------------------------------------------------|
|  | 19. exp morphine/ae, dt [Adverse Drug Reaction, Drug Therapy]                            |
|  | 20. morphine.mp                                                                          |
|  | 21. exp oxycodone/ae, dt [Adverse Drug Reaction, Drug Therapy]                           |
|  | 22. oxycodone.mp                                                                         |
|  | 23. 8 OR 9 OR 10 OR 11 OR 12 OR 13 OR 14 OR 15 OR 16 OR 17 OR 18 OR 19 OR 20 OR 21 OR 22 |
|  | 24. 7 AND 23                                                                             |
|  | 25. Limit 24 to human                                                                    |
|  | 26. Limit 25 publication type to <i>Journal: Article</i>                                 |

**TABLE S1c.** Search strategy in CENTRAL

|                |                                                                                                                                                                                                                                                                                                                                                                                                                                                                                                                                                                                                                                                                                                                                                                                                                                                                                                                                                                                                                                                                                                                                                                                                                                                                                                                                                                                     |
|----------------|-------------------------------------------------------------------------------------------------------------------------------------------------------------------------------------------------------------------------------------------------------------------------------------------------------------------------------------------------------------------------------------------------------------------------------------------------------------------------------------------------------------------------------------------------------------------------------------------------------------------------------------------------------------------------------------------------------------------------------------------------------------------------------------------------------------------------------------------------------------------------------------------------------------------------------------------------------------------------------------------------------------------------------------------------------------------------------------------------------------------------------------------------------------------------------------------------------------------------------------------------------------------------------------------------------------------------------------------------------------------------------------|
| Breathlessness | 1. MeSH descriptor: [Dyspnea] explode all trees and with qualifier(s): [Drug therapy – DT]<br>2. dyspn*.ti,ab,kw (Word variations have been searched)<br>3. breathless*.ti,ab,kw (Word variations have been searched)<br>4. “breath* labour*”.ti,ab,kw (Word variations have been searched)<br>5. “short* of breath*”.ti,ab,kw (Word variations have been searched)<br>6. “breath* difficult*”.ti,ab,kw (Word variations have been searched)<br>7. #1 OR #2 OR #3 OR #4 OR #5 OR #6                                                                                                                                                                                                                                                                                                                                                                                                                                                                                                                                                                                                                                                                                                                                                                                                                                                                                                 |
| Opioids        | 8. MeSH descriptor: [Analgesics, Opioid] explode all trees and with qualifier(s): [Adverse effects – AE, Therapeutic use – TU]<br>9. opioid*.ti,ab,kw (Word variations have been searched)<br>10. opiate*.ti,ab,kw (Word variations have been searched)<br>11. MeSH descriptor: [Codeine] explode all trees and with qualifier(s): [Adverse effects – AE, Therapeutic use – TU]<br>12. codeine.ti,ab,kw (Word variations have been searched)<br>13. MeSH descriptor: [Heroin] explode all trees and with qualifier(s): [Adverse effects – AE, Therapeutic use – TU]<br>14. diamorphine.ti,ab,kw (Word variations have been searched)<br>15. MeSH descriptor: [Fentanyl] explode all trees and with qualifier(s): [Adverse effects – AE, Therapeutic use – TU]<br>16. fentanyl.ti,ab,kw (Word variations have been searched)<br>17. dihydrocodeine.ti,ab,kw (Word variations have been searched)<br>18. MeSH descriptor: [Morphine] explode all trees and with qualifier(s): [Adverse effects – AE, Therapeutic use – TU]<br>19. morphine.ti,ab,kw (Word variations have been searched)<br>20. MeSH descriptor: [Oxycodone] explode all trees and with qualifier(s): [Adverse effects – AE, Therapeutic use – TU]<br>21. oxycodone.ti,ab,kw (Word variations have been searched)<br>22. #8 OR #9 OR #10 OR #11 OR #12 OR #13 OR #14 OR #15 OR #16 OR #17 OR #18 OR #19 OR #20 OR #21 |
|                | 23. #7 AND #22                                                                                                                                                                                                                                                                                                                                                                                                                                                                                                                                                                                                                                                                                                                                                                                                                                                                                                                                                                                                                                                                                                                                                                                                                                                                                                                                                                      |
|                | 24. Limit #23 to <i>trials</i>                                                                                                                                                                                                                                                                                                                                                                                                                                                                                                                                                                                                                                                                                                                                                                                                                                                                                                                                                                                                                                                                                                                                                                                                                                                                                                                                                      |

**TABLE S1d.** Search strategy in CINAHL

|                |                                                                                                                                                                                                                                                                                                     |
|----------------|-----------------------------------------------------------------------------------------------------------------------------------------------------------------------------------------------------------------------------------------------------------------------------------------------------|
| Breathlessness | 1. (MH “Dyspnea+/DT”)<br>2. TI dyspn* OR AB dyspn*<br>3. TI breathless* OR AB breathless*<br>4. TI “breath* labour*” OR AB “breath* labour*”<br>5. TI “short* of breath*” OR AB “short* of breath*”<br>6. TI “breath* difficult*” OR AB “breath* difficult*”<br>7. S1 OR S2 OR S3 OR S4 OR S5 OR S6 |
| Opioids        | 8. (MH “Analgesics, Opioid+/AE/TU”)<br>9. TI opioid* OR AB opioid*<br>10. TI opiate* OR AB opiate*<br>11. (MH “Codeine+/AE/TU”)<br>12. TI codeine OR AB codeine                                                                                                                                     |

|  |                                                                                                                                                                                                                                                                                                                                                                                                                           |
|--|---------------------------------------------------------------------------------------------------------------------------------------------------------------------------------------------------------------------------------------------------------------------------------------------------------------------------------------------------------------------------------------------------------------------------|
|  | 13. (MH "Heroin+/AE/TU ")<br>14. TI diamorphine OR AB diamorphine<br>15. (MH "Fentanyl+/AE/TU ")<br>16. TI fentanyl OR AB fentanyl<br>17. TI dihydrocodeine OR AB dihydrocodeine<br>18. (MH "Morphine+/AE/TU ")<br>19. TI morphine OR AB morphine<br>20. (MH "Oxycodone+/AE/TU ")<br>21. TI oxycodone OR AB oxycodone<br>22. S8 OR S9 OR S10 OR S11 OR S12 OR S13 OR S14 OR S15 OR S16 OR S17 OR S18 OR S19 OR S20 OR S21 |
|  | 23. S7 AND S21; Limiters - Human                                                                                                                                                                                                                                                                                                                                                                                          |

**TABLE S1e.** Search strategy in ClinicalTrials.gov

|                |                                                                                                                                                                                                                                                                                                                                                                                                                                                                                                                                                                                                                                                                                                                                                                                                                                      |
|----------------|--------------------------------------------------------------------------------------------------------------------------------------------------------------------------------------------------------------------------------------------------------------------------------------------------------------------------------------------------------------------------------------------------------------------------------------------------------------------------------------------------------------------------------------------------------------------------------------------------------------------------------------------------------------------------------------------------------------------------------------------------------------------------------------------------------------------------------------|
| Breathlessness | 1. Dyspnea (condition/disease)<br>2. Dyspnea (other terms)<br>3. Dyspnoea (other terms)<br>4. Breathlessness (condition/disease)<br>5. Breathlessness (other terms)<br>6. Breath shortness (condition/disease)<br>7. S1 OR S2 OR S3 OR S4 OR S5 OR S6                                                                                                                                                                                                                                                                                                                                                                                                                                                                                                                                                                                |
| Opioids        | 8. Opioids (intervention/treatment)<br>9. Opioid analgesic (intervention/treatment)<br>10. Analgesics, opioid (intervention/treatment)<br>11. Opiate (intervention/treatment)<br>12. Opioid (other terms)<br>13. Analgesic (other terms)<br>14. Codeine (intervention/treatment)<br>15. Codeine (other terms)<br>16. Diamorphine (intervention/treatment)<br>17. Diamorphine (other terms)<br>18. Fentanyl (intervention/treatment)<br>19. Fentanyl (other terms)<br>20. Dihydrocodeine (intervention/treatment)<br>21. Dihydrocodeine (other terms)<br>22. Morphine (intervention/treatment)<br>23. Morphine (other terms)<br>24. Oxycodone (intervention/treatment)<br>25. Oxycodone (other terms)<br>26. S8 OR S9 OR S10 OR S11 OR S12 OR S13 OR S14 OR S15 OR S16 OR S17 OR S18 OR S19 OR S20 OR S21 OR S22 OR S23 OR S24 OR S25 |
|                | 27. S7 AND S26                                                                                                                                                                                                                                                                                                                                                                                                                                                                                                                                                                                                                                                                                                                                                                                                                       |

| TABLE S2. Patient characteristics, study design and results of observational studies |                    |                                                                                                     |                                                                                                                                                                                |                                                                |                                                                                                         |                                                                                              |                                     |                                                                    |                          |                                                                                                                                                                             |
|--------------------------------------------------------------------------------------|--------------------|-----------------------------------------------------------------------------------------------------|--------------------------------------------------------------------------------------------------------------------------------------------------------------------------------|----------------------------------------------------------------|---------------------------------------------------------------------------------------------------------|----------------------------------------------------------------------------------------------|-------------------------------------|--------------------------------------------------------------------|--------------------------|-----------------------------------------------------------------------------------------------------------------------------------------------------------------------------|
| Study                                                                                | Design             | N<br>(% men)                                                                                        | Population (n)                                                                                                                                                                 | Age (yr)                                                       | Opioid                                                                                                  | Dose (mg/day)                                                                                | Administration                      | Duration                                                           | Patient<br>setting       | Outcomes: difference<br><i>Definition of RD</i>                                                                                                                             |
| Allen, 2005 [1]                                                                      | Pro-<br>spective   | 11 (27)                                                                                             | IPF (11)                                                                                                                                                                       | Mean 68<br>(range 78-92)                                       | Diamorphine                                                                                             | 2.5-5.0 mg                                                                                   | Parenteral                          | Single dose                                                        | Inpatient                | SaO <sub>2</sub> : 0%<br>RR: -2 breaths/minute<br>RD: 0<br><i>Change in vital signs<br/>or oxygen saturation</i>                                                            |
| Colman, 2015 [2]                                                                     | Retro-<br>spective | 64 (45)<br>59 received<br>opioids                                                                   | Patients awaiting lung<br>transplantation;<br>ILD (51)<br>BO (5)<br>COPD (4)<br>PH (4)                                                                                         | Mean 59.4<br>(SD 9.4)                                          | Morphine or<br>hydromorphone <sup>1</sup>                                                               | Median dose:<br>SR: 30 MED<br>(range 20-840)<br>IR: 15 MED<br>(range 6-60)<br>AN: no data    | Oral                                | Median<br>follow-up: 153<br>days                                   | Inpatient/<br>outpatient | RD: 0                                                                                                                                                                       |
| Farncombe, 1994 [3]                                                                  | Retro-<br>spective | 54 (43)                                                                                             | Cancer (40)<br>ORD (3)<br>RRD (3)<br>cardiac disease (6)<br>AIDS (1)<br>bowel obstruction (1)                                                                                  | Median 62<br>(range 21-90)                                     | Morphine <sup>2</sup><br>Hydromorphone <sup>2</sup><br>Codeine <sup>2</sup><br>Anileridine <sup>2</sup> | 30-180<br>6-120<br>90-360<br>150-300                                                         | Nebulized                           | 1-3 doses (12)<br>1-2 days (8)<br>3-14 days (17)<br>> 15 days (17) | Inpatient/<br>outpatient | PaCO <sub>2</sub> : no significant<br>change (n=4)<br>SaO <sub>2</sub> : no significant<br>change (n=4)<br>RR: 10-30% decrease,<br>but non below 16<br>breaths/minute (n=8) |
| Hu, 2014 [4]                                                                         | Pro-<br>spective   | 136 (57)<br>27 used opioid for<br>breathlessness at<br>admission and 36<br>2 days prior to<br>death | Cancer (136)                                                                                                                                                                   | ≤ 18 (3)<br>19-35 (6)<br>36-50 (27)<br>51-64 (31)<br>≥ 65 (69) | Morphine                                                                                                | At admission:<br>Mean 37.7 MED<br>(SD 38.6)<br>Prior to death:<br>Mean 44.7 MED<br>(SD 52.3) | Oral,<br>parenteral, or<br>combined | No data                                                            | Inpatient                | RD: 1 (also at start of<br>study)<br><i>Decrease in RR to less<br/>than 10 times per<br/>minute.</i>                                                                        |
| Kanemoto, 2007 [5]                                                                   | Retro-<br>spective | 337 (74)<br>92 reported<br>breathlessness<br>and received<br>morphine                               | Cancer (212)<br>IIP/CDPF (47)<br>Pneumonia (41)<br>COPD (22)<br>Bronchiectasis (7)<br>Tuberculosis (3)<br>Pyothorax (2)<br>PH (1)<br>Thromboembolism (1)<br>Pneumoconiosis (1) | Median 72<br>(range 22-96)                                     | Morphine                                                                                                | No data                                                                                      | Parenteral                          | No data                                                            | Inpatient                | RD: 0                                                                                                                                                                       |
| Kawabata, 2013 [6]                                                                   | Retro-<br>spective | 95 (55)<br>44 administrations<br>for episodes of                                                    | Cancer (95)                                                                                                                                                                    | Mean 71.7<br>(range 47-92)                                     | Oxycodone <sup>2</sup>                                                                                  | Mean 44.6<br>(range 5.5-206.6)                                                               | Parenteral                          | Mean: 14.4<br>days                                                 | Inpatient                | RD: 3                                                                                                                                                                       |

| TABLE S2. Patient characteristics, study design and results of observational studies |                |                                  |                |                     |                                   |                                                        |                |          |                 |                                                                                                                     |
|--------------------------------------------------------------------------------------|----------------|----------------------------------|----------------|---------------------|-----------------------------------|--------------------------------------------------------|----------------|----------|-----------------|---------------------------------------------------------------------------------------------------------------------|
| Study                                                                                | Design         | N (% men)                        | Population (n) | Age (yr)            | Opioid                            | Dose (mg/day)                                          | Administration | Duration | Patient setting | Outcomes: difference<br>Definition of RD                                                                            |
|                                                                                      |                | breathlessness                   |                |                     |                                   |                                                        |                |          |                 |                                                                                                                     |
| Oxberry, 2013 [7]                                                                    | Pro-spective   | 33 (85)                          | CHF (33)       | Mean 71.9 (SD 9.1)  | Morphine or oxycodone vs. placebo | Morphine: 20<br>Oxycodone: 10                          | Oral           | 3 months | Outpatient      | SaO <sub>2</sub> : -1% in users, +1% in non-users<br>RR: -1 breaths/minute in users, -2 breaths/minute in non-users |
| Pang, 2016 [8]                                                                       | Pro-spective   | 16 (50)                          | Cancer (16)    | Mean 63.6 SD (13.5) | Fentanyl                          | Responders: 0.22 (0.17)<br>Non-responders: 0.28 (0.20) | Parenteral     | 24 hours | Inpatient       | RR: -4 breaths/minute in responders; -2 breaths/minute in non-responders <sup>3</sup>                               |
| Sporer, 2006 [9]                                                                     | Retro-spective | 319 (47)<br>20 received morphine | ADHF (319)     | Mean 77 (SD 12)     | Morphine                          | No data                                                | No data        | No data  | Outpatient      | SaO <sub>2</sub> : no change (no data shown)<br>RR: no change (no data shown)                                       |

ADHF: acute decompensated heart failure; AIDS: acquired immune deficiency syndrome; AN: opioids on “as needed” basis; BO: bronchiolitis obliterans; CDPF: collagen disease-related pulmonary fibrosis; CHF: chronic heart failure; COPD: chronic obstructive pulmonary disease; IIP: idiopathic interstitial pneumonia; ILD: interstitial lung disease; IPF: idiopathic pulmonary fibrosis; IR: immediate-release opioids; MED: morphine equivalent dose; ORD: obstructive respiratory disease; PaCO<sub>2</sub>: partial pressure of arterial carbon dioxide; PaO<sub>2</sub>: partial pressure of arterial oxygen; PH: pulmonary hypertension; RD: respiratory depressions; RR: respiratory rate; RRD: restrictive respiratory disease; SaO<sub>2</sub>: arterial oxygen saturation; SR: sustained-release opioids

<sup>1</sup> intervention is started on an as needed basis and transitioned to standing immediate-release opioids or sustained release opioids (with or without immediate-release opioids as needed) as tolerated;

<sup>2</sup> application of opioid for breakthrough breathlessness possible

<sup>3</sup> median change

| TABLE S3. Patient characteristics and results of case reports |        |                                              |          |                             |                       |                |                   |                                  |                 |                                                                                                                                                       |
|---------------------------------------------------------------|--------|----------------------------------------------|----------|-----------------------------|-----------------------|----------------|-------------------|----------------------------------|-----------------|-------------------------------------------------------------------------------------------------------------------------------------------------------|
| Study                                                         | Gender | Diagnosis                                    | Age (yr) | Opioid                      | Dose                  | Administration | Duration          | Pre-treatment?                   | Patient setting | Outcomes                                                                                                                                              |
| Benitez-Rosario, 2005 [10]                                    | Female | Lung cancer                                  | 67       | Fentanyl <sup>1</sup>       | 1200 µg               | Oral           | Single dose       | 400 mg intravenous morphine/day  | Inpatient       | SaO <sub>2</sub> : 90 to 91%<br>RR: 22 to 14 breaths/minute                                                                                           |
|                                                               | Male   | Lung cancer                                  | 52       | Fentanyl <sup>1</sup>       | 400 µg                | Oral           | 2 doses in 30 min | 90 mg SR morphine/day            | Inpatient       | SaO <sub>2</sub> : remained 93%<br>RR: 20 to 18 breaths/minute                                                                                        |
|                                                               | Female | Colon cancer                                 | 57       | Fentanyl <sup>1</sup>       | 400 µg                | Oral           | Single dose       | 15 mg intravenous morphine/day   | Inpatient       | SaO <sub>2</sub> : remained 89%<br>RR: remained 20 breaths/minute                                                                                     |
| Farncombe, 1993 [11]                                          | Male   | IPF                                          | 73       | Morphine                    | 30-150 mg             | Nebulized      | 3 months          | No                               | Inpatient       | RR: slight decrease<br>RD: no                                                                                                                         |
|                                                               | Male   | IPF                                          | 68       | Morphine                    | 30-105 mg             | Nebulized      | At least 2 weeks  | No                               | Inpatient       | RD: no                                                                                                                                                |
|                                                               | Male   | CAD and COPD                                 | 74       | Morphine                    | 2.5 mg                | Nebulized      | Single dose       | Intravenous morphine             | Inpatient       | PaCO <sub>2</sub> : 7.2 to 6.4 kPa<br>PaO <sub>2</sub> : 8.5 to 9.9 kPa<br>SaO <sub>2</sub> : 87 to 93%<br>RR: 32 to 28 breaths/minute<br>RD: no      |
|                                                               | Female | CHF and COPD                                 | 72       | Morphine                    | 2.5 mg                | Nebulized      | Single dose       | Intravenous morphine             | Inpatient       | PaCO <sub>2</sub> : 4.8 to 4.7 kPa<br>PaO <sub>2</sub> : 12.4 to 12.7 kPa<br>SaO <sub>2</sub> : remained 98%<br>RR: 30 to 26 breaths/minute<br>RD: no |
| Farncombe, 1994 [12]                                          | Male   | Lung cancer, CHF and COPD                    | 91       | Morphine                    | 60-90 mg/day          | Nebulized      | At least 2 days   | 30 mg nebulized morphine/day     | Inpatient       | RR: 36 to 26 breaths/minute                                                                                                                           |
|                                                               | Female | Lung cancer                                  | 61       | Hydro-morphone <sup>1</sup> | 48 mg/day             | Nebulized      | No data           | ± 480 mg oral hydro-morphone/day | Outpatient      | RR: 34 to 26 breaths/minute                                                                                                                           |
| Lang, 1997 [13]                                               | Female | Probably primary lung cancer with metastases | 74       | Morphine <sup>1</sup>       | 4 mg                  | Nebulized      | Single dose       | 30 mg oral morphine/day          | Inpatient       | RD: yes                                                                                                                                               |
| Sitte, 2008 [14]                                              | Male   | Lung cancer                                  | 73       | Fentanyl <sup>1</sup>       | 150 µg                | Nasal          | Single dose       | No data                          | Outpatient      | SaO <sub>2</sub> : 62 to 94%<br>RR: 30 to 12 breaths/minute<br>RD: no                                                                                 |
|                                                               | Female | CHF, COPD and PH                             | 88       | Fentanyl <sup>1</sup>       | 1000 µg               | Nasal          | Single dose       | No data                          | Outpatient      | SaO <sub>2</sub> : 65 to 75%<br>RR: 40-50 to 20 breaths/minute<br>RD: no                                                                              |
|                                                               | Male   | ILD                                          | 72       | Fentanyl <sup>1</sup>       | 400 µg/administration | Nasal          | Two weeks         | No                               | Outpatient      | RD: no                                                                                                                                                |
| Sitte,                                                        | Male   | COPD and lung                                | 85       | Fentanyl <sup>1</sup>       | 2000-4000             | Nasal          | No data           | 32 mg SR                         | Outpatient      | RD: no                                                                                                                                                |

| TABLE S3. Patient characteristics and results of case reports |        |             |          |          |                              |                      |          |                   |                 |          |
|---------------------------------------------------------------|--------|-------------|----------|----------|------------------------------|----------------------|----------|-------------------|-----------------|----------|
| Study                                                         | Gender | Diagnosis   | Age (yr) | Opioid   | Dose                         | Administration       | Duration | Pre-treatment?    | Patient setting | Outcomes |
| 2009 [15]                                                     |        | cancer      |          |          | µg/day                       |                      |          | hydromorphone/day |                 |          |
|                                                               | Male   | Lung cancer | 53       | Fentanyl | 1200 µg/day + 200 µg/episode | Parenteral and nasal | No data  | No data           | Outpatient      | RD: no   |

CAD: coronary artery disease; CHF: congestive heart failure; COPD: chronic obstructive pulmonary disease; ILD: interstitial lung disease; IPF: idiopathic pulmonary fibrosis; PaCO<sub>2</sub>: partial pressure of arterial carbon dioxide; PaO<sub>2</sub>: partial pressure of arterial oxygen; PH: pulmonary hypertension; RD: respiratory depressions; RR: respiratory rate; SaO<sub>2</sub>: arterial oxygen saturation; SR: sustained-release.

<sup>1</sup> intervention prescribed for an episode of breakthrough breathlessness



| TABLE S4. Characteristics and study design of ongoing studies |                        |                     |                      |              |             |                    |                |              |                       |                 |                                                                               |
|---------------------------------------------------------------|------------------------|---------------------|----------------------|--------------|-------------|--------------------|----------------|--------------|-----------------------|-----------------|-------------------------------------------------------------------------------|
| Study name                                                    | Clinical-Trials number | Design              | Estimate sample size | Population   | Opioid      | Dose               | Administration | Comparison   | Duration              | Patient setting | Included outcomes                                                             |
| -                                                             | NCT02454751            | NRT, NB, cross-over | 20                   | CHF          | Fentanyl    | 50 µg              | Nebulized      | No treatment | Single dose           | Outpatient      | Secondary: SaO <sub>2</sub> , RR pre- and post-exercise                       |
| -                                                             | NCT03018756            | RCT, DB, cross-over | 20                   | IPF          | Fentanyl    | 100 µg             | Nebulized      | Placebo      | Single dose           | Outpatient      | Secondary: RR pre- and post-exercise                                          |
| MORPHILD                                                      | NCT02622022            | RCT, DB, parallel   | 36                   | ILD          | Morphine    | 20-40 mg/day       | Oral           | Placebo      | One week              | Unknown         | Secondary: SaO <sub>2</sub> in rest                                           |
| MORDYC                                                        | NCT02429050            | RCT, DB, parallel   | 124                  | COPD         | Morphine SR | 20-30 mg/day       | Oral           | Placebo      | Four weeks            | Outpatient      | Primary: PaCO <sub>2</sub> , PaO <sub>2</sub> , SaO <sub>2</sub> , RR in rest |
| DYS-NOC                                                       | NCT02801838            | NRT, SB, parallel   | 50                   | ICU patients | Morphine    | 10 mg              | No data        | No treatment | Single or double dose | Inpatient       | Secondary: blood gases in rest                                                |
| BEAMS                                                         | NCT02720822            | RCT, DB, parallel   | 171                  | COPD         | Morphine SR | 8, 16, 24 or 32 mg | Oral           | Placebo      | Three weeks           | Outpatient      | Secondary: PetCO <sub>2</sub> , SaO <sub>2</sub> in rest                      |

**TABLE S5.** Risk of bias of randomized controlled trials

|                              | Random sequence generation<br>(selection bias) | Allocation concealment<br>(selection bias) | Blinding of participants and<br>personnel (performance bias) | Blinding of outcome assessment<br>(detection bias) | Incomplete outcome data<br>(attrition bias) | Selective outcome reporting<br>(reporting bias) | Other sources of bias |
|------------------------------|------------------------------------------------|--------------------------------------------|--------------------------------------------------------------|----------------------------------------------------|---------------------------------------------|-------------------------------------------------|-----------------------|
| Abernethy, 2003 [16]         | +                                              | +                                          | +                                                            | +                                                  | +                                           | -                                               | -                     |
| Allard, 1999 [17]            | ?                                              | +                                          | +                                                            | +                                                  | +                                           | +                                               | +                     |
| Beauford, 1993 [18]          | ?                                              | ?                                          | +                                                            | ?                                                  | +                                           | -                                               | -                     |
| Bruera, 1993 (part 1) [19]   | ?                                              | ?                                          | ?                                                            | ?                                                  | +                                           | +                                               | -                     |
| Charles, 2008 [20]           | +                                              | +                                          | +                                                            | +                                                  | +                                           | +                                               | -                     |
| Chua, 1997 [21]              | ?                                              | ?                                          | +                                                            | ?                                                  | +                                           | +                                               | -                     |
| Cuervo Pinna, 2015 [22]      | ?                                              | ?                                          | +                                                            | ?                                                  | +                                           | -                                               | +                     |
| Eiser, 1991 (part 1) [23]    | ?                                              | ?                                          | ?                                                            | ?                                                  | +                                           | +                                               | -                     |
| Eiser, 1991 (part 2) [23]    | ?                                              | ?                                          | ?                                                            | ?                                                  | +                                           | +                                               | -                     |
| Gamborg, 2013 [24]           | ?                                              | ?                                          | +                                                            | ?                                                  | +                                           | -                                               | +                     |
| Grimbert, 2004 [25]          | ?                                              | +                                          | +                                                            | +                                                  | +                                           | -                                               | +                     |
| Harris-Eze, 1995 [26]        | ?                                              | +                                          | +                                                            | +                                                  | +                                           | +                                               | +                     |
| Hui, 2014 [27]               | +                                              | +                                          | +                                                            | +                                                  | +                                           | +                                               | -                     |
| Jankelson, 1997 [28]         | ?                                              | +                                          | +                                                            | +                                                  | +                                           | +                                               | -                     |
| Jensen, 2012 [29]            | ?                                              | +                                          | +                                                            | +                                                  | -                                           | +                                               | +                     |
| Johnson, 2002 [30]           | +                                              | +                                          | +                                                            | +                                                  | +                                           | +                                               | +                     |
| Krajnik, 2009 [31]           | ?                                              | ?                                          | -                                                            | -                                                  | +                                           | -                                               | +                     |
| Light, 1989 [32]             | ?                                              | ?                                          | -                                                            | -                                                  | +                                           | +                                               | -                     |
| Light, 1996 [33]             | ?                                              | ?                                          | +                                                            | ?                                                  | +                                           | +                                               | ?                     |
| Masood, 1995 [34]            | ?                                              | ?                                          | +                                                            | ?                                                  | +                                           | -                                               | +                     |
| Mazzocato, 1999 [35]         | ?                                              | ?                                          | +                                                            | ?                                                  | +                                           | +                                               | +                     |
| Munck, 1990 (part 2) [36]    | ?                                              | ?                                          | ?                                                            | ?                                                  | -                                           | +                                               | +                     |
| Natalini, 2011 [37]          | +                                              | +                                          | +                                                            | +                                                  | +                                           | +                                               | +                     |
| Navigante, 2010 [38]         | +                                              | +                                          | -                                                            | -                                                  | +                                           | -                                               | +                     |
| Nosedá, 1997 [39]            | ?                                              | ?                                          | +                                                            | +                                                  | +                                           | +                                               | +                     |
| Otulana, 2004 (phase 3) [40] | -                                              | -                                          | -                                                            | -                                                  | ?                                           | -                                               | -                     |
| Oxberry, 2011 [41]           | +                                              | +                                          | +                                                            | +                                                  | +                                           | +                                               | +                     |
| Poole, 1998 [42]             | +                                              | +                                          | ?                                                            | +                                                  | +                                           | +                                               | +                     |
| Rice, 1987 [43]              | +                                              | ?                                          | ?                                                            | ?                                                  | +                                           | +                                               | +                     |
| Robin, 1986 [44]             | +                                              | +                                          | -                                                            | -                                                  | -                                           | +                                               | +                     |
| Schonhofer, 1998 [45]        | -                                              | -                                          | -                                                            | -                                                  | -                                           | +                                               | -                     |
| Shohrati, 2012 [46]          | ?                                              | ?                                          | +                                                            | ?                                                  | +                                           | +                                               | -                     |
| Smith, 2009 [47]             | ?                                              | ?                                          | +                                                            | +                                                  | -                                           | +                                               | ?                     |
| Williams, 2003 [48]          | ?                                              | ?                                          | +                                                            | +                                                  | +                                           | +                                               | -                     |
| Woodcock, 1982 [49]          | ?                                              | ?                                          | +                                                            | +                                                  | -                                           | ?                                               | -                     |

+ low risk of bias; - high risk of bias; ? unclear risk of bias.

| TABLE S6. Risk of bias of non-randomized trials |                                                |                                            |                                                              |                                                    |                                             |                                                 |                       |
|-------------------------------------------------|------------------------------------------------|--------------------------------------------|--------------------------------------------------------------|----------------------------------------------------|---------------------------------------------|-------------------------------------------------|-----------------------|
|                                                 | Random sequence generation<br>(selection bias) | Allocation concealment<br>(selection bias) | Blinding of participants and personnel<br>(performance bias) | Blinding of outcome assessment<br>(detection bias) | Incomplete outcome data<br>(attrition bias) | Selective outcome reporting<br>(reporting bias) | Other sources of bias |
| Allcroft, 2013 [50]                             | -                                              | -                                          | -                                                            | -                                                  | +                                           | -                                               | +                     |
| Boyd, 1997 [51]                                 | -                                              | -                                          | -                                                            | -                                                  | +                                           | +                                               | +                     |
| Bruera, 1990 [52]                               | -                                              | -                                          | -                                                            | -                                                  | +                                           | +                                               | +                     |
| Bruera, 1993 (part 2) [19]                      | -                                              | -                                          | -                                                            | -                                                  | +                                           | +                                               | -                     |
| Clemens, 2007 [53]                              | -                                              | -                                          | -                                                            | -                                                  | +                                           | +                                               | +                     |
| Clemens, 2008.1 [54]                            | -                                              | -                                          | -                                                            | -                                                  | +                                           | +                                               | +                     |
| Clemens, 2008.2 [55]                            | -                                              | -                                          | -                                                            | -                                                  | +                                           | +                                               | +                     |
| Clemens, 2008.3 [56]                            | -                                              | -                                          | -                                                            | -                                                  | +                                           | +                                               | +                     |
| Clemens, 2009 [57]                              | -                                              | -                                          | -                                                            | -                                                  | +                                           | +                                               | +                     |
| Clemens, 2011 [58]                              | -                                              | -                                          | -                                                            | -                                                  | +                                           | +                                               | +                     |
| Cohen, 1991 [59]                                | -                                              | -                                          | -                                                            | -                                                  | +                                           | +                                               | +                     |
| Coyne, 2002 [60]                                | -                                              | -                                          | -                                                            | -                                                  | -                                           | +                                               | +                     |
| Currow, 2011 [61]                               | -                                              | -                                          | -                                                            | -                                                  | +                                           | +                                               | +                     |
| Gauna, 2008 [62]                                | -                                              | -                                          | -                                                            | -                                                  | +                                           | +                                               | -                     |
| Munck, 1990 (part 1) [36]                       | -                                              | -                                          | -                                                            | -                                                  | +                                           | -                                               | +                     |
| Otulana, 2004 (phase 4) [40]                    | -                                              | -                                          | -                                                            | -                                                  | ?                                           | -                                               | -                     |
| Tanaka, 1999 [63]                               | -                                              | -                                          | -                                                            | -                                                  | +                                           | +                                               | -                     |

+ low risk of bias; - high risk of bias; ? unclear risk of bias.

| <b>TABLE S7. Risk of bias of prospective observational studies</b> |                                      |                                 |                           |                                       |                          |                       |                     |                       |       |
|--------------------------------------------------------------------|--------------------------------------|---------------------------------|---------------------------|---------------------------------------|--------------------------|-----------------------|---------------------|-----------------------|-------|
|                                                                    | Representativeness of exposed cohort | Selection of non-exposed cohort | Ascertainment of exposure | Outcome of interest at start of study | Comparability of cohorts | Assessment of outcome | Length of follow-up | Adequacy of follow-up | Total |
| Allen, 2005 [1]                                                    | ★                                    |                                 | ★                         | ★                                     |                          | ★                     | ★                   | ★                     | 6     |
| Hu, 2004 [4]                                                       | ★                                    |                                 | ★                         |                                       |                          |                       |                     | ★                     | 3     |
| Oxberry, 2013 [7]                                                  | ★                                    | ★                               |                           |                                       |                          |                       | ★                   | ★                     | 4     |
| Pang, 2016 [8]                                                     | ★                                    |                                 | ★                         | ★                                     |                          |                       | ★                   | ★                     | 5     |

| TABLE S8. Results of randomized controlled trials |                         |                                                      |                                    |                                                                      |                        |                                                      |                                 |                                                                                                 |                                 |                                                                                          |                            |
|---------------------------------------------------|-------------------------|------------------------------------------------------|------------------------------------|----------------------------------------------------------------------|------------------------|------------------------------------------------------|---------------------------------|-------------------------------------------------------------------------------------------------|---------------------------------|------------------------------------------------------------------------------------------|----------------------------|
| Study                                             | PaCO <sub>2</sub> (kPa) |                                                      | PetCO <sub>2</sub> (kPa)           |                                                                      | PaO <sub>2</sub> (kPa) |                                                      | SaO <sub>2</sub> (%)            |                                                                                                 | RR (breaths/minute)             |                                                                                          | RD<br>number<br>Definition |
|                                                   | Measure                 | Result                                               | Measure                            | Result                                                               | Measure                | Result                                               | Measure                         | Result                                                                                          | Measure                         | Result                                                                                   |                            |
| Abernethy, 2003 [16]                              | -                       | -                                                    | -                                  | -                                                                    | -                      | -                                                    | Excluded (no data shown)        | -                                                                                               | At rest                         | I: 20 (5)<br>C: 21 (4)                                                                   | 0                          |
| Allard, 1999 [17]                                 | -                       | -                                                    | -                                  | -                                                                    | -                      | -                                                    | -                               | -                                                                                               | At rest                         | O: -1.6 (2.3) <sup>1*</sup>                                                              | -                          |
| Beauford, 1993 [18]                               | -                       | -                                                    | At rest and on exertion (Emax)     | No change (no data shown)                                            | -                      | -                                                    | Excluded (baseline data shown)  | -                                                                                               | -                               | -                                                                                        | -                          |
| Bruera, 1993 (part 1) [19]                        | -                       | -                                                    | -                                  | -                                                                    | -                      | -                                                    | At rest                         | I: 92 (2)<br>C: 92 (2)                                                                          | At rest                         | I: 24 (8)<br>C: 22 (10)                                                                  | -                          |
| Charles, 2008 [20]                                | -                       | -                                                    | -                                  | -                                                                    | -                      | -                                                    | At rest                         | N: +1.9 (6.1) <sup>1</sup><br>S: +0.2 (6.0) <sup>1</sup><br>C: +2.1 (3.4) <sup>1*</sup>         | At rest                         | N: -3.7 (5.0) <sup>1*</sup><br>S: -4.7 (6.1) <sup>1</sup><br>C: -4.2 (4.5) <sup>1*</sup> | -                          |
| Chua, 1997 [21]                                   | -                       | -                                                    | At rest and on exertion (Bruce), % | R-I: 5.0 (0.5)<br>R-C: 4.6 (0.6)<br>E-I: 5.3 (0.9)<br>E-C: 5.0 (0.9) | -                      | -                                                    | At rest and on exertion (Bruce) | R-I: 99.3 (1.0) <sup>‡</sup><br>R-C: 100 (0) <sup>‡</sup><br>E-I: 98.9 (1.4)<br>E-C: 99.5 (0.9) | At rest and on exertion (Bruce) | R-I: 14<br>R-C: 18<br>E-I: 23<br>E-C: 26                                                 | -                          |
| Cuervo Pinna, 2015 [22]                           | -                       | -                                                    | -                                  | -                                                                    | -                      | -                                                    | At rest and on exertion (6MWT)  | R-I: 93.2 (3.7)<br>R-C: 93.8 (3.9)<br>E-I: 90.3 (5.6)<br>E-C: 91.5 (6.1)                        | Excluded (no data shown)        | -                                                                                        | -                          |
| Eiser, 1991 (part 1) [23]                         | At rest, arterial       | 2.5 mg: 5.4 (0.9)<br>5 mg: 5.0 (0.6)<br>C: 5.2 (0.6) | At rest                            | 2.5 mg: 4.4 (0.9)<br>5 mg: 4.5 (1.3)<br>C: 4.1 (0.9)                 | At rest, arterial      | 2.5 mg: 8.6 (1.3)<br>5 mg: 9.7 (1.3)<br>C: 9.0 (1.9) | At rest                         | 2.5 mg: 90 (6.3)<br>5 mg: 89 (6.3)<br>C: 89 (6.3)                                               | -                               | -                                                                                        | -                          |
| Eiser, 1991 (part 2) [23]                         | At rest, arterial       | I: 5.3 (0.3) <sup>†</sup><br>C: 5.0 (0.3)            | -                                  | -                                                                    | At rest, arterial      | I: 8.6 (0.6) <sup>†</sup><br>C: 9.2 (0.8)            | -                               | -                                                                                               | -                               | -                                                                                        | -                          |
| Gamborg, 2013 [24]                                | -                       | -                                                    | -                                  | -                                                                    | -                      | -                                                    | At rest                         | No change (no data shown)                                                                       | At rest                         | No change (no data shown)                                                                | 0                          |
| Grimbert, 2004 [25]                               | -                       | -                                                    | -                                  | -                                                                    | -                      | -                                                    | At rest                         | O: 94.4 (3.3)                                                                                   | At rest                         | O: 21.2 (8.4)                                                                            | -                          |
| Harris-Eze, 1995 [26]                             | -                       | -                                                    | On exertion (Emax)                 | No change (no data shown)                                            | -                      | -                                                    | At rest and on exertion (Emax)  | R: no change (no data shown)<br>E-2.5 mg: 85 (7)<br>E-5 mg: 85 (6)                              | At rest and on exertion (Emax)  | R: no change (no data shown)<br>E-2.5 mg: 40 (9)<br>E-5 mg: 43 (11)                      | -                          |

**TABLE S8.** Results of randomized controlled trials

| Study                | PaCO <sub>2</sub> (kPa)                  |                                                                                   | PetCO <sub>2</sub> (kPa)       |                                                                      | PaO <sub>2</sub> (kPa)                   |                                                                                     | SaO <sub>2</sub> (%)           |                                                                                                                                                                              | RR (breaths/minute)            |                                                                                                                                                                            | RD                                  |
|----------------------|------------------------------------------|-----------------------------------------------------------------------------------|--------------------------------|----------------------------------------------------------------------|------------------------------------------|-------------------------------------------------------------------------------------|--------------------------------|------------------------------------------------------------------------------------------------------------------------------------------------------------------------------|--------------------------------|----------------------------------------------------------------------------------------------------------------------------------------------------------------------------|-------------------------------------|
|                      | Measure                                  | Result                                                                            | Measure                        | Result                                                               | Measure                                  | Result                                                                              | Measure                        | Result                                                                                                                                                                       | Measure                        | Result                                                                                                                                                                     | number<br>Definition                |
|                      |                                          |                                                                                   |                                |                                                                      |                                          |                                                                                     |                                | E-C: 84 (7)                                                                                                                                                                  |                                | E-C: 40 (12)                                                                                                                                                               |                                     |
| Hui, 2014 [27]       | -                                        | -                                                                                 | -                              | -                                                                    | -                                        | -                                                                                   | At rest and on exertion (6MWT) | R-I: 96.5 (2.6); -0.6 (1.1) <sup>1</sup><br>R-C: 96.2 (1.9); +1.2 (2.1) <sup>1</sup><br>E-I: 96.8 (2.4); -1.2 (1.7) <sup>1</sup><br>E-C: 96.1 (1.9); +0.8 (2.7) <sup>1</sup> | At rest and on exertion (6MWT) | R-I: 18.2 (1.6); -0.6 (3.3) <sup>1</sup><br>R-C: 18.6 (1.6); 0 (1.1) <sup>1</sup><br>E-I: 21.0 (2.9); -2.4 (2.7) <sup>1*</sup><br>E-C: 23.4 (3.9); -1.2 (3.9) <sup>1</sup> | -                                   |
| Jankelson, 1997 [28] | -                                        | -                                                                                 | -                              | -                                                                    | -                                        | -                                                                                   | On exertion (6MWT)             | 20 mg: 87.4 (6.6)<br>40 mg: 87.6 (6.2)<br>C: 87.2 (4.6)                                                                                                                      | -                              | -                                                                                                                                                                          | -                                   |
| Jensen, 2012 [29]    | -                                        | -                                                                                 | At rest and on exertion (CWRT) | R-I: 4.9 (0.5)<br>R-C: 4.9 (0.6)<br>E-I: 5.8 (1.0)<br>E-C: 5.8 (1.0) | -                                        | -                                                                                   | At rest and on exertion (CWRT) | R-I: 96.3 (1.7)<br>R-C: 96.5 (1.4)<br>E-I: 94.1 (3.1)<br>I-C: 93.4 (6.6)                                                                                                     | At rest and on exertion (CWRT) | R-I: 19.7 (4.2)<br>R-C: 20.2 (4.2)<br>E-I: 33.8 (5.5)<br>E-C: 35.1 (4.5)                                                                                                   | 0                                   |
| Johnson, 2002 [30]   | -                                        | -                                                                                 | -                              | -                                                                    | -                                        | -                                                                                   | -                              | -                                                                                                                                                                            | At rest                        | I: 21 (6)<br>C: 21 (6)                                                                                                                                                     | -                                   |
| Krajnik, 2009 [31]   | At rest, venous                          | No change (no data shown)                                                         | -                              | -                                                                    | At rest, venous                          | No change (no data shown)                                                           | At rest                        | No change (no data shown)                                                                                                                                                    | -                              | -                                                                                                                                                                          | -                                   |
| Light, 1989 [32]     | At rest and on exertion (Emax), arterial | R-I: 4.9 (0.9)<br>R-C: 4.7 (0.6)<br>E-I: 5.6 (1.0)<br>E-C: 5.1 (1.1) <sup>‡</sup> | -                              | -                                                                    | At rest and on exertion (Emax), arterial | R-I: 10.2 (1.6)<br>R-C: 10.4 (1.9)<br>E-I: 8.9 (1.5)<br>E-C: 9.6 (2.1) <sup>‡</sup> | At rest and on exertion (Emax) | R-I: 93.5 (3.2)<br>R-C: 94.1 (3.1)<br>E-I: 89.9 (6.4)<br>E-C: 91.4 (6.3) <sup>‡</sup>                                                                                        | At rest and on exertion (Emax) | R-I: 19.9 (4.2)<br>R-C: 20.1 (1.7)<br>E-I: 28.0 (4.8)<br>E-C: 31.6 (6.1)                                                                                                   | -                                   |
| Light, 1996 [33]     | -                                        | -                                                                                 | On exertion (Emax)             | I: +0.1 (0.2) <sup>1</sup><br>C: -0.1 (0.2) <sup>1</sup>             | -                                        | -                                                                                   | -                              | -                                                                                                                                                                            | -                              | -                                                                                                                                                                          | -                                   |
| Masood, 1995 [34]    | -                                        | -                                                                                 | -                              | -                                                                    | -                                        | -                                                                                   | On exertion (Emax)             | O: 93.7 (3.6)                                                                                                                                                                | On exertion (Emax)             | O: 53.7 (17.4)                                                                                                                                                             | -                                   |
| Mazzocato, 1999 [35] | -                                        | -                                                                                 | -                              | -                                                                    | -                                        | -                                                                                   | At rest                        | I: 0 (1.5) <sup>1</sup><br>C: -0.8 (1.3) <sup>1</sup>                                                                                                                        | At rest                        | I: -2 (2.2) <sup>1</sup><br>C: 0 (1.7) <sup>1#</sup>                                                                                                                       | 0<br>Difference in SaO <sub>2</sub> |
| Munck, 1990          | At rest, arterial                        | I: +0.2 (-0.3;0.8) <sup>2</sup><br>C: -0.1 (-0.7;1.3) <sup>2</sup>                | -                              | -                                                                    | At rest, arterial                        | I: -0.4 (-3.9;1.5) <sup>2</sup><br>C: -0.3 (-2.3;1.9) <sup>2</sup>                  | At rest                        | O: 0 <sup>3</sup>                                                                                                                                                            | Excluded (no data)             | -                                                                                                                                                                          | -                                   |

**TABLE S8.** Results of randomized controlled trials

| Study                        | PaCO <sub>2</sub> (kPa) |                                                                                  | PetCO <sub>2</sub> (kPa) |        | PaO <sub>2</sub> (kPa) |                                                                                                                                     | SaO <sub>2</sub> (%) |                                                                                                                                                                                                            | RR (breaths/minute) |                                                                                                                                                                                                              | RD                   |
|------------------------------|-------------------------|----------------------------------------------------------------------------------|--------------------------|--------|------------------------|-------------------------------------------------------------------------------------------------------------------------------------|----------------------|------------------------------------------------------------------------------------------------------------------------------------------------------------------------------------------------------------|---------------------|--------------------------------------------------------------------------------------------------------------------------------------------------------------------------------------------------------------|----------------------|
|                              | Measure                 | Result                                                                           | Measure                  | Result | Measure                | Result                                                                                                                              | Measure              | Result                                                                                                                                                                                                     | Measure             | Result                                                                                                                                                                                                       | number<br>Definition |
| (part 2) [36]                |                         |                                                                                  |                          |        |                        |                                                                                                                                     |                      |                                                                                                                                                                                                            | shown)              |                                                                                                                                                                                                              |                      |
| Natalini, 2011 [37]          | At rest, arterial       | PSV-I: 6.27 (1.9)*<br>PSV-C: 5.9 (1.9)                                           | -                        | -      | At rest, arterial      | PSV-I: 14.4 (13.2;19.7) <sup>4</sup> ; -0.27 (-2.67;-1.33) <sup>5</sup><br>PSV-C: 12.0 (11.7;13.9) <sup>4</sup> ; no cfb data shown | -                    | -                                                                                                                                                                                                          | At rest             | PSV-I: 19 (5)*; +8 (4;12) <sup>5</sup><br>PSV-C: 29 (27;30) <sup>4</sup> ; no cfb data shown<br>UB-I: 20 (18;23) <sup>4</sup> *; +9 (6;13) <sup>5</sup><br>UB-C: 31 (5); no cfb data shown                   | -                    |
| Navigante, 2010 [38]         | -                       | -                                                                                | -                        | -      | -                      | -                                                                                                                                   | At rest              | FTP-I: 94.1 (3.7)<br>FTP-C: 94.7 (2.9)<br>FUP-I: 94.6 (2.8)<br>FUP-C: 94.6 (3.1)                                                                                                                           | -                   | -                                                                                                                                                                                                            | -                    |
| Nosedá, 1997 [39]            | -                       | -                                                                                | -                        | -      | -                      | -                                                                                                                                   | At rest              | 10mg+O <sub>2</sub> : 93 (6)*<br>20mg+O <sub>2</sub> : 94 (4)*<br>10mg-O <sub>2</sub> : 90 (8)<br>C: 95 (4)*                                                                                               | At rest             | 10mg+O <sub>2</sub> : 17.9 (5.3)<br>20mg+O <sub>2</sub> : 19.1 (4.6)<br>10mg-O <sub>2</sub> : 19.0 (3.9)<br>C: 19.1 (3.9)                                                                                    | -                    |
| Otulana, 2004 (phase 3) [40] | -                       | -                                                                                | -                        | -      | -                      | -                                                                                                                                   | At rest              | No change (no data shown)                                                                                                                                                                                  | At rest             | No change (no data shown)                                                                                                                                                                                    | -                    |
| Oxberry, 2011 [41]           | -                       | -                                                                                | -                        | -      | -                      | -                                                                                                                                   | At rest              | 1h-mor: -0.5 (1.7) <sup>1</sup><br>1h-oxy: -0.2 (1.5) <sup>1</sup><br>1h-C: -0.6 (1.6) <sup>1</sup><br>4d-mor: -0.7 (2.0) <sup>1</sup><br>4d-oxy: -0.5 (2.0) <sup>1</sup><br>4d-C: -0.3 (1.7) <sup>1</sup> | At rest             | 1h-mor: -1.1 (1.7) <sup>1</sup><br>1h-oxy: -1.6 (1.6) <sup>1</sup><br>1h-C: -1.1 (2.0) <sup>1</sup><br>4d-mor: -0.5 (2.7) <sup>1</sup><br>4d-oxy: -1.6 (2.5) <sup>1</sup><br>4d-con: -0.9 (2.7) <sup>1</sup> | -                    |
| Poole, 1998 [42]             | -                       | -                                                                                | -                        | -      | -                      | -                                                                                                                                   | At rest              | I: +0.3 (1.5) <sup>1</sup><br>C: +0.1 (0.9) <sup>1</sup>                                                                                                                                                   | -                   | -                                                                                                                                                                                                            | -                    |
| Rice, 1987 [43]              | At rest, arterial       | 24h-I: 5.59 (0.6)*<br>24h-C: 5.45 (0.3)<br>1m-I: 5.45 (0.5)*<br>1m-C: 5.20 (0.8) | -                        | -      | At rest, arterial      | 4h-I: 7.81 (1.5)<br>24h-C: 8.65 (1.5)<br>1m-I: 8.45 (1.5)<br>1m-C: 7.99 (1.3)                                                       | -                    | -                                                                                                                                                                                                          | -                   | -                                                                                                                                                                                                            | -                    |
| Robin, 1986 [44]             | At rest                 | No change (no data shown)                                                        | -                        | -      | At rest                | No change (no data shown)                                                                                                           | -                    | -                                                                                                                                                                                                          | -                   | -                                                                                                                                                                                                            | -                    |
| Schonhofer, 1998 [45]        | At rest, capillary      | I: 5.41 (0.6)* <sup>‡</sup><br>C: 4.88 (0.7)                                     | -                        | -      | At rest, capillary     | I: 7.77 (0.7)* <sup>‡</sup><br>C: 8.24 (0.8)                                                                                        | -                    | -                                                                                                                                                                                                          | -                   | -                                                                                                                                                                                                            | 0                    |

| TABLE S8. Results of randomized controlled trials |                         |                                                                                 |                          |                              |                        |                                                       |                      |                              |                     |                                                           |                            |
|---------------------------------------------------|-------------------------|---------------------------------------------------------------------------------|--------------------------|------------------------------|------------------------|-------------------------------------------------------|----------------------|------------------------------|---------------------|-----------------------------------------------------------|----------------------------|
| Study                                             | PaCO <sub>2</sub> (kPa) |                                                                                 | PetCO <sub>2</sub> (kPa) |                              | PaO <sub>2</sub> (kPa) |                                                       | SaO <sub>2</sub> (%) |                              | RR (breaths/minute) |                                                           | RD<br>number<br>Definition |
|                                                   | Measure                 | Result                                                                          | Measure                  | Result                       | Measure                | Result                                                | Measure              | Result                       | Measure             | Result                                                    |                            |
| Shohrati, 2012 [46]                               | -                       | -                                                                               | -                        | -                            | -                      | -                                                     | -                    | -                            | At rest             | I: -1.5 (1.1) <sup>1#</sup><br>C: -0.1 (0.3) <sup>1</sup> | -                          |
| Smith, 2009 [47]                                  | -                       | -                                                                               | -                        | -                            | -                      | -                                                     | At rest              | No change<br>(no data shown) | At rest             | No change<br>(no data shown)                              | -                          |
| Williams, 2003 [48]                               | -                       | -                                                                               | On exertion (Emax)       | I: 5.2 (1.0)<br>C: 5.1 (0.9) | -                      | -                                                     | -                    | -                            | On exertion (Emax)  | I: 29 (4)<br>C: 31 (8)                                    | -                          |
| Woodcock, 1982 [49]                               | At rest, arterial       | 30mg: 4.67 (0.5) <sup>‡</sup><br>60mg: 4.77 (0.4) <sup>‡</sup><br>C: 4.42 (0.4) | -                        | -                            | At rest, arterial      | 30mg: 9.57 (0.7)<br>60mg: 9.35 (1.0)<br>C: 9.45 (0.6) | -                    | -                            | -                   | -                                                         | -                          |

Results are displayed as post-treatment scores + standard deviation are presented, unless stated else.

C: change in control group; cfb: change from baseline; CWRT: constant work rate test; E: measured on exertion; Emax: maximal exercise test; I: change in intervention group; N: change in nebulized group; O: overall change (no specification of change in intervention and control group); PaCO<sub>2</sub>: partial pressure of arterial carbon dioxide; PaO<sub>2</sub>: partial pressure of arterial oxygen; PetCO<sub>2</sub>: partial pressure of end-tidal carbon dioxide; PSV: pressure support ventilation; R: measured at rest; RD: respiratory depression; RR: respiratory rate; S: change in systemic group; SaO<sub>2</sub>: arterial oxygen saturation; UB: unassisted breathing.

\* significant different change between baseline and post-treatment

<sup>‡</sup> significant difference between post-treatment of intervention and control group

<sup>†</sup> trend for a difference

<sup>#</sup> significant different change between intervention and control group

<sup>1</sup> mean change from baseline + standard deviation

<sup>2</sup> median change from baseline + range

<sup>3</sup> median change from baseline

<sup>4</sup> median post-treatment score + interquartile range post-treatment scores

<sup>5</sup> median change from baseline + interquartile range change from baseline



| TABLE S9. Results of non-randomized trials |                          |                                                                                                |                          |                           |                        |        |                               |                                                                                                  |                      |                                                                                                   |                                                                                                                                                    |
|--------------------------------------------|--------------------------|------------------------------------------------------------------------------------------------|--------------------------|---------------------------|------------------------|--------|-------------------------------|--------------------------------------------------------------------------------------------------|----------------------|---------------------------------------------------------------------------------------------------|----------------------------------------------------------------------------------------------------------------------------------------------------|
| Study                                      | PaCO <sub>2</sub> (kPa)  |                                                                                                | PetCO <sub>2</sub> (kPa) |                           | PaO <sub>2</sub> (kPa) |        | SaO <sub>2</sub> (%)          |                                                                                                  | RR (breaths/ minute) |                                                                                                   | RD<br><br>number<br>Definition                                                                                                                     |
|                                            | Measure                  | Result                                                                                         | Measure                  | Result                    | Measure                | Result | Measure                       | Result                                                                                           | Measure              | Result                                                                                            |                                                                                                                                                    |
| Allcroft, 2013 [50]                        | -                        | -                                                                                              | At rest                  | No change (no data shown) | -                      | -      | Excluded (baseline data only) | -                                                                                                | -                    | -                                                                                                 | 0                                                                                                                                                  |
| Boyd, 1997 [51]                            | -                        | -                                                                                              | -                        | -                         | -                      | -      | -                             | -                                                                                                | At rest              | 0                                                                                                 | -                                                                                                                                                  |
| Bruera, 1990 [52]                          | -                        | -                                                                                              | At rest                  | 4.40 (1.2)                | -                      | -      | At rest                       | 86 (11)                                                                                          | At rest              | 31 (9)                                                                                            | -                                                                                                                                                  |
| Bruera, 1993 (part 2) [19]                 | -                        | -                                                                                              | -                        | -                         | -                      | -      | -                             | -                                                                                                | -                    | -                                                                                                 | 0                                                                                                                                                  |
| Clemens, 2007 [53]                         | -                        | -                                                                                              | -                        | -                         | -                      | -      | At rest                       | 95 (4.0)                                                                                         | At rest              | 29 (5)*                                                                                           | 0                                                                                                                                                  |
| Clemens, 2008.1 [54]                       | At rest, trans-cutaneous | 5.71 (0.7)                                                                                     | -                        | -                         | -                      | -      | At rest                       | 93.3 (2.8)                                                                                       | At rest              | -29.0 (4.0)*                                                                                      | 0<br>Increase in PaCO <sub>2</sub>                                                                                                                 |
| Clemens, 2008.2 [55]                       | At rest, trans-cutaneous | 4.52 (0.8)                                                                                     | -                        | -                         | -                      | -      | At rest                       | 94.8 (4.0)                                                                                       | At rest              | 29.0 (3.1)*                                                                                       | 0<br>Increase in PaCO <sub>2</sub> >6.0 kPa or ≥0.5 kPa above baseline, decrease in RR < 10 breaths/ minute and decrease in SaO <sub>2</sub> < 90% |
| Clemens, 2008.3 [56]                       | At rest, trans-cutaneous | ON: 4.99 (8.8)<br>PT: 4.52 (1.1)                                                               | -                        | -                         | -                      | -      | At rest                       | ON: 95.1 (4.5)<br>PT: 94.3 (3.7)                                                                 | At rest              | ON: 28.0 (3.0)*<br>PT: 28.3 (3.1)*                                                                | 0<br>Increase in PaCO <sub>2</sub> >6.0 kPa or ≥0.5 kPa above baseline, decrease in RR < 10 breaths/ minute and decrease in SaO <sub>2</sub> < 90% |
| Clemens, 2009 [57]                         | At rest, trans-cutaneous | Hypoxic/ON: 5.20 (0.7)<br>Hypoxic/PT: 4.67 (1.2)<br>Non-hypoxic/ON: 5.07 (0.8)<br>Non-hypoxic/ | -                        | -                         | -                      | -      | At rest                       | Hypoxic/ON: 91.0 (1.2)*<br>Hypoxic/PT: 87.0 (6.0)*<br>Non-hypoxic/ON: 95.0 (3.5)<br>Non-hypoxic/ | At rest              | Hypoxic/ON: 24.5 (4.4)*<br>Hypoxic/PT: 26.3 (4.6)*<br>Non-hypoxic/ON: 27.0 (4.0)*<br>Non-hypoxic/ | 0<br>Increase in PaCO <sub>2</sub> >6.0 kPa or ≥0.5 kPa above baseline, decrease in RR < 10 breaths/ minute and decrease in SaO <sub>2</sub> <     |

| TABLE S9. Results of non-randomized trials |                                       |                           |                          |        |                                       |                                                                                                                          |                      |                                                                                     |                      |                                                                                           |                                                                                                                                                    |
|--------------------------------------------|---------------------------------------|---------------------------|--------------------------|--------|---------------------------------------|--------------------------------------------------------------------------------------------------------------------------|----------------------|-------------------------------------------------------------------------------------|----------------------|-------------------------------------------------------------------------------------------|----------------------------------------------------------------------------------------------------------------------------------------------------|
| Study                                      | PaCO <sub>2</sub> (kPa)               |                           | PetCO <sub>2</sub> (kPa) |        | PaO <sub>2</sub> (kPa)                |                                                                                                                          | SaO <sub>2</sub> (%) |                                                                                     | RR (breaths/ minute) |                                                                                           | RD<br><br>number<br>Definition                                                                                                                     |
|                                            | Measure                               | Result                    | Measure                  | Result | Measure                               | Result                                                                                                                   | Measure              | Result                                                                              | Measure              | Result                                                                                    |                                                                                                                                                    |
|                                            |                                       | PT: 4.80 (0.8)            |                          |        |                                       |                                                                                                                          |                      | PT: 95.0 (3.0)                                                                      |                      | PT: 27.0 (3.4)*                                                                           | 90%                                                                                                                                                |
| Clemens, 2011 [58]                         | At rest, trans-cutaneous              | 5.03 (0.7)                | -                        | -      | -                                     | -                                                                                                                        | At rest              | 95.2 (3.5)                                                                          | At rest              | 32.0 (4.0)*                                                                               | 0<br>Increase in PaCO <sub>2</sub> >6.0 kPa or ≥0.5 kPa above baseline, decrease in RR < 10 breaths/ minute and decrease in SaO <sub>2</sub> < 90% |
| Cohen, 1991 [59]                           | At rest, unclear place of measurement | Increase (no data shown)  | -                        | -      | At rest, unclear place of measurement | Increase in patients with PaO <sub>2</sub> <8.0 kPa; decrease in patients with PaO <sub>2</sub> >8.0 kPa (no data shown) | -                    | -                                                                                   | At rest              | Fluctuation in RR; only in 1 patient the RR fell below 10 breaths/ minute (no data shown) | -                                                                                                                                                  |
| Coyne, 2002 [60]                           | -                                     | -                         | -                        | -      | -                                     | -                                                                                                                        | At rest              | 96.7 (1.2)*                                                                         | At rest              | 24.1 (1.7)*                                                                               | -                                                                                                                                                  |
| Currow, 2011 [61]                          | -                                     | -                         | -                        | -      | -                                     | -                                                                                                                        | -                    | -                                                                                   | -                    | -                                                                                         | 0                                                                                                                                                  |
| Gauna, 2008 [62]                           | -                                     | -                         | -                        | -      | -                                     | -                                                                                                                        | At rest              | 95.3 (3.2)                                                                          | At rest              | 22.6 (5.5) *                                                                              | -                                                                                                                                                  |
| Munck, 1990 (part 1) [36]                  | At rest, arterial                     | No change (no data shown) | -                        | -      | At rest, arterial                     | No change (baseline data only)                                                                                           | At rest              | SaO <sub>2</sub> declined temporarily from 93 to 92 after 1 hour on day 2 (120 mg)* | At rest              | No change (no data shown)                                                                 | 0                                                                                                                                                  |
| Otulana, 2004 (phase 4) [40]               | -                                     | -                         | -                        | -      | -                                     | -                                                                                                                        | -                    | -                                                                                   | At rest              | No change (no data shown)                                                                 | -                                                                                                                                                  |
| Tanaka, 1999 [63]                          | -                                     | -                         | -                        | -      | -                                     | -                                                                                                                        | At rest              | No change (no data shown)                                                           | At rest              | No change (no data shown)                                                                 | 0<br>Decrease in RR > 10% and reduction of SaO <sub>2</sub> > 5.                                                                                   |

Results are displayed as post-treatment scores + standard deviation are presented, unless stated else.

ON: opioid-naïve; PaCO<sub>2</sub>: partial pressure of arterial carbon dioxide; PaO<sub>2</sub>: partial pressure of oxygen; PetCO<sub>2</sub>: partial pressure of end-tidal carbon dioxide; PT: pre-treated; RD: respiratory depression; RR: respiratory rate; SaO<sub>2</sub>: arterial oxygen saturation.

\* significant change from baseline

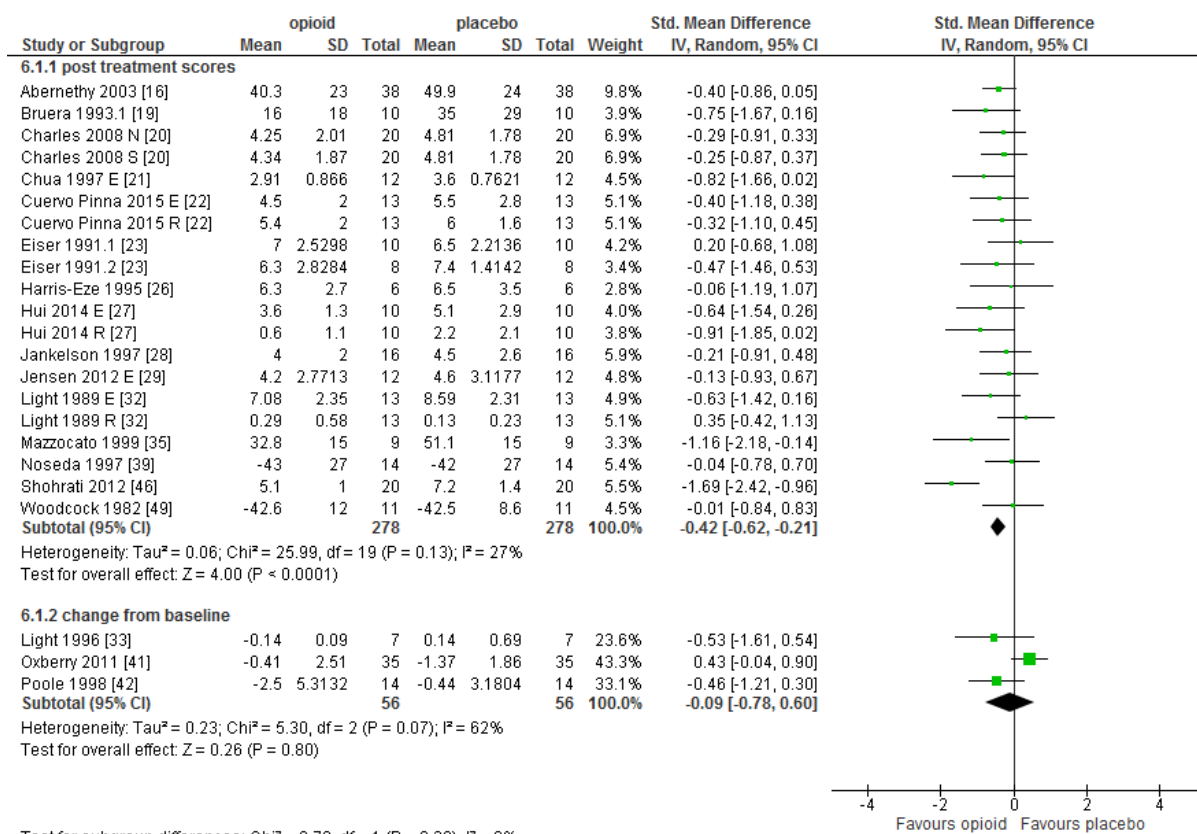

**FIGURE S1.** Effect of opioid treatment in patients with advanced disease on breathlessness.

E: measured on exertion; N: nebulized administration; R: measured at rest; S: systemic administration.

## References

1. Allen S, Raut S, Woollard J, Vassallo M. Low dose diamorphine reduces breathlessness without causing a fall in oxygen saturation in elderly patients with end-stage idiopathic pulmonary fibrosis. *Palliative medicine* 2005; 19: 128-130.
2. Colman R, Singer LG, Barua R, Downar J. Outcomes of lung transplant candidates referred for co-management by palliative care: A retrospective case series. *Palliative medicine* 2015; 29: 429-435.
3. Farncombe M, Chater S, Gillin A. The use of nebulized opioids for breathlessness: A chart review. *Palliative medicine* 1994; 8: 306-312.
4. Hu WY, Chiu TY, Cheng SY, Chen CY. Morphine for dyspnea control in terminal cancer patients: Is it appropriate in taiwan? *Journal of pain and symptom management* 2004; 28: 356-363.
5. Kanemoto K, Satoh H, Kagohashi K, Kurishima K, Ishikawa H, Ohtsuka M. Psychotropic drugs for terminally ill patients with respiratory disease. *Tuberkuloz ve Toraks* 2007; 55: 5-10.
6. Kawabata M, Kaneishi K. Continuous subcutaneous infusion of compound oxycodone for the relief of dyspnea in patients with terminally ill cancer: A retrospective study. *The American journal of hospice & palliative care* 2013; 30: 305-311.
7. Oxberry SG, Bland JM, Clark AL, Cleland JG, Johnson MJ. Repeat dose opioids may be effective for breathlessness in chronic heart failure if given for long enough. *Journal of palliative medicine* 2013; 16: 250-255.
8. Pang GS, Qu LM, Tan YY, Yee AC. Intravenous Fentanyl for Dyspnea at the End of Life: Lessons for Future Research in Dyspnea. *The American journal of hospice & palliative care* 2016; 33: 222-227.
9. Sporer KA, Tabas JA, Tam RK, Sellers KL, Rosenson J, Barton CW, Pletcher MJ. Do medications affect vital signs in the prehospital treatment of acute decompensated heart failure? *Prehospital Emergency Care* 2006; 10: 41-45.
10. Benitez-Rosario MA, Martin AS, Feria M. Oral transmucosal fentanyl citrate in the management of dyspnea crises in cancer patients. *Journal of pain and symptom management* 2005; 30: 395-397.
11. Farncombe M, Chater S. Case studies outlining use of nebulized morphine for patients with end-stage chronic lung and cardiac disease. *Journal of pain and symptom management* 1993; 8: 221-225.
12. Farncombe M, Chater S. Clinical application of nebulized opioids for treatment of dyspnoea in patients with malignant disease. *Supportive care in cancer : official journal of the Multinational Association of Supportive Care in Cancer* 1994; 2: 184-187.
13. Lang E, Jedeikin R. Acute respiratory depression as a complication of nebulised morphine. *Canadian journal of anaesthesia = Journal canadien d'anesthesie* 1997; 45: 60-62.
14. Sitte T, Bausewein C. Intranasal fentanyl for episodic breathlessness. *Journal of pain and symptom management* 2008; 36: e3-6.
15. Sitte T. Nasal application of fentanyl citrate as symptom control against breathlessness in palliative care--overview and case report. *Wiener medizinische Wochenschrift (1946)* 2009; 159: 566-570.
16. Abernethy AP, Currow DC, Frith P, Fazekas BS, McHugh A, Bui C. Randomised, double blind, placebo controlled crossover trial of sustained release morphine for the management of refractory dyspnoea. *BMJ (Clinical research ed)* 2003; 327: 523-528.
17. Allard P, Lamontagne C, Bernard P, Tremblay C. How effective are supplementary doses of opioids for dyspnea in terminally ill cancer patients? A randomized continuous sequential clinical trial. *Journal of pain and symptom management* 1999; 17: 256-265.
18. Beauford W, Saylor TT, Stansbury DW, Avalos K, Light RW. Effects of nebulized morphine sulfate on the exercise tolerance of the ventilatory limited COPD patient. *Chest* 1993; 104: 175-178.
19. Bruera E, MacEachern T, Ripamonti C, Hanson J. Subcutaneous morphine for dyspnea in cancer patients. *Annals of internal medicine* 1993; 119: 906-907.
20. Charles MA, Reymond L, Israel F. Relief of incident dyspnea in palliative cancer patients: A pilot, randomized, controlled trial comparing nebulized hydromorphone, systemic hydromorphone, and nebulized saline. *Journal of pain and symptom management* 2008; 36: 29-38.
21. Chua TP, Harrington D, Ponikowski P, Webb-Peploe K, Poole-Wilson PA, Coats AJ. Effects of dihydrocodeine on chemosensitivity and exercise tolerance in patients with chronic heart failure. *Journal of the American College of Cardiology* 1997; 29: 147-152.
22. Cuervo Pinna MÁ, Bruera E, Redondo Moralo MJ, Sánchez Correás MÁ, Mota Vargas R. A randomized crossover clinical trial to evaluate the efficacy of oral transmucosal fentanyl citrate in the treatment of dyspnea on exertion in patients with advanced cancer. *American Journal of Hospice & Palliative Medicine* 2015; 32: 298-304 297p.

23. Eiser N, Denman WT, West C, Luce P. Oral diamorphine: lack of effect on dyspnoea and exercise tolerance in the "pink puffer" syndrome. *The European respiratory journal* 1991; 4: 926-931.
24. Gamborg H, Riis J, Christrup L, Krantz T. Effect of intraoral and subcutaneous morphine on dyspnea at rest in terminal patients with primary lung cancer or lung metastases. *Journal of opioid management* 2013; 9: 269-274.
25. Grimbart D, Lubin O, de Monte M, Vecellio None L, Perrier M, Carre P, Lemarie E, Boissinot E, Diot P. Dyspnea and morphine aerosols in the palliative care of lung cancer. *Revue des maladies respiratoires* 2004; 21: 1091-1097.
26. Harris-Eze AO, Sridhar G, Clemens RE, Zintel TA, Gallagher CG, Marciniuk DD. Low-dose nebulized morphine does not improve exercise in interstitial lung disease. *American journal of respiratory and critical care medicine* 1995; 152: 1940-1945.
27. Hui D, Xu A, Frisbee-Hume S, Chisholm G, Morgado M, Reddy S, Bruera E. Effects of prophylactic subcutaneous fentanyl on exercise-induced breakthrough dyspnea in cancer patients: A preliminary double-blind, randomized, controlled trial. *Journal of pain and symptom management* 2014; 47: 209-217.
28. Jankelson D, Hosseini K, Mather LE, Seale JP, Young IH. Lack of effect of high doses of inhaled morphine on exercise endurance in chronic obstructive pulmonary disease. *The European respiratory journal* 1997; 10: 2270-2274.
29. Jensen D, Alshail A, Viola R, Dudgeon DJ, Webb KA, O'Donnell DE. Inhaled fentanyl citrate improves exercise endurance during high-intensity constant work rate cycle exercise in chronic obstructive pulmonary disease. *Journal of pain and symptom management* 2012; 43: 706-719.
30. Johnson MJ, McDonagh TA, Harkness A, McKay SE, Dargie HJ. Morphine for the relief of breathlessness in patients with chronic heart failure--a pilot study. *European journal of heart failure* 2002; 4: 753-756.
31. Krajnik M, Podolec Z, Siekierka M, Sykutera M, Pufal E, Sobanski P, Makarewicz R, Neef C, Punt N, Zyllicz Z. Morphine inhalation by cancer patients: A comparison of different nebulization techniques using pharmacokinetic, spirometric, and gasometric parameters. *Journal of pain and symptom management* 2009; 38: 747-757.
32. Light RW, Muro JR, Sato R, I., Stansbury DW, Fischer C, E., Brown SE. Effects of oral morphine on breathlessness and exercise tolerance in patients with chronic obstructive pulmonary disease. *The American review of respiratory disease* 1989; 139: 126-133.
33. Light RW, Stansbury DW, Webster JS. Effect of 30 mg of morphine alone or with promethazine or prochlorperazine on the exercise capacity of patients with COPD. *Chest* 1996; 109: 975-981.
34. Masood AR, Reed JW, Thomas SH. Lack of effect of inhaled morphine on exercise-induced breathlessness in chronic obstructive pulmonary disease. *Thorax* 1995; 50: 629-634.
35. Mazzocato C, Buclin T, Rapin CH. The effects of morphine on dyspnea and ventilatory function in elderly patients with advanced cancer: a randomized double-blind controlled trial. *Annals of oncology : official journal of the European Society for Medical Oncology / ESMO* 1999; 10: 1511-1514.
36. Munck LK, Christensen CB, Pedersen L, Larsen U, Branebjerg PE, Kampmann JP. Codeine in analgesic doses does not depress respiration in patients with severe chronic obstructive lung disease. *Pharmacology & toxicology* 1990; 66: 335-340.
37. Natalini G, Di Maio A, Rosano A, Ferretti P, Bertelli M, Bernardini A. Remifentanyl improves breathing pattern and reduces inspiratory workload in tachypneic patients. *Respiratory care* 2011; 56: 827-833.
38. Navigante AH, Castro MA, Cerchietti LC. Morphine versus midazolam as upfront therapy to control dyspnea perception in cancer patients while its underlying cause is sought or treated. *Journal of pain and symptom management* 2010; 39: 820-830.
39. Nosedá A, Carpioux JP, Markstein C, Meyvaert A, de Maertelaer V. Disabling dyspnoea in patients with advanced disease: lack of effect of nebulized morphine. *The European respiratory journal* 1997; 10: 1079-1083.
40. Otulana B, Okikawa J, Linn L, Morishige R, Thipphawong J. Safety and pharmacokinetics of inhaled morphine delivered using the aerx system in patients with moderate-to-severe asthma. *International journal of clinical pharmacology and therapeutics* 2004; 42: 456-462.
41. Oxberry SG, Torgerson DJ, Bland JM, Clark AL, Cleland JG, Johnson MJ. Short-term opioids for breathlessness in stable chronic heart failure: a randomized controlled trial. *European journal of heart failure* 2011; 13: 1006-1012.
42. Poole PJ, Veale AG, Black PN. The effect of sustained-release morphine on breathlessness and quality of life in severe chronic obstructive pulmonary disease. *American journal of respiratory and critical care medicine* 1998; 157: 1877-1880.

43. Rice KL, Kronenberg RS, Hedemark LL, Niewoehner DE. Effects of chronic administration of codeine and promethazine on breathlessness and exercise tolerance in patients with chronic airflow obstruction. *British journal of diseases of the chest* 1987; 81: 287-292.
44. Robin ED, Burke CM. Single-patient randomized clinical trial. Opiates for intractable dyspnea. *Chest* 1986; 90: 888-892.
45. Schonhofer B, Kohler D. Value of orally administered retard morphine for therapy of severe pulmonary emphysema of the pink-puffer type. A pilot study. *Deutsche medizinische Wochenschrift (1946)* 1998; 123: 1433-1438.
46. Shohrati M, Ghanei M, Harandi AA, Foroghi S, Harandi AA. Effect of nebulized morphine on dyspnea of mustard gas-exposed patients: a double-blind randomized clinical trial study. *Pulm Med* 2012; 2012: 610921.
47. Smith TJ, Coyne P, French W, Ramakrishnan V, Corrigan P. Failure to accrue to a study of nebulized fentanyl for dyspnea: Lessons learned. *Journal of palliative medicine* 2009; 12: 771-772.
48. Williams SG, Wright DJ, Marshall P, Reese A, Tzeng BH, Coats AJ, Tan LB. Safety and potential benefits of low dose diamorphine during exercise in patients with chronic heart failure. *Heart (British Cardiac Society)* 2003; 89: 1085-1086.
49. Woodcock AA, Johnson MA, Geddes DM. Breathlessness, alcohol, and opiates. *The New England journal of medicine* 1982; 306: 1363-1364.
50. Allcroft P, Margitanovic V, Greene A, Agar MR, Clark K, Abernethy AP, Currow DC. The role of benzodiazepines in breathlessness: a single site, open label pilot of sustained release morphine together with clonazepam. *Journal of palliative medicine* 2013; 16: 741-744.
51. Boyd KJ, Kelly M. Oral morphine as symptomatic treatment of dyspnoea in patients with advanced cancer. *Palliative medicine* 1997; 11: 277-281.
52. Bruera E, Macmillan K, Pither J, MacDonald RN. Effects of morphine on the dyspnea of terminal cancer patients. *Journal of pain and symptom management* 1990; 5: 341-344.
53. Clemens KE, Klaschik E. [symptomatic treatment of dyspnoea in patients receiving palliative care: Nasal delivery of oxygen compared with opioid administration]. *Deutsche medizinische Wochenschrift (1946)* 2007; 132: 1939-1943.
54. Clemens KE, Klaschik E. Morphine in the management of dyspnoea in als. A pilot study. *European journal of neurology* 2008; 15: 445-450.
55. Clemens KE, Klaschik E. Effect of hydromorphone on ventilation in palliative care patients with dyspnea. *Supportive care in cancer : official journal of the Multinational Association of Supportive Care in Cancer* 2008; 16: 93-99.
56. Clemens KE, Quednau I, Klaschik E. Is there a higher risk of respiratory depression in opioid-naïve palliative care patients during symptomatic therapy of dyspnea with strong opioids? *Journal of palliative medicine* 2008; 11: 204-216.
57. Clemens KE, Quednau I, Klaschik E. Use of oxygen and opioids in the palliation of dyspnoea in hypoxic and non-hypoxic palliative care patients: a prospective study. *Supportive care in cancer : official journal of the Multinational Association of Supportive Care in Cancer* 2009; 17: 367-377.
58. Clemens KE, Klaschik E. Dyspnoea associated with anxiety--symptomatic therapy with opioids in combination with lorazepam and its effect on ventilation in palliative care patients. *Supportive care in cancer : official journal of the Multinational Association of Supportive Care in Cancer* 2011; 19: 2027-2033.
59. Cohen MH, Anderson AJ, Krasnow SH, Spagnolo SV, Citron ML, Payne M, Fossieck Jr BE. Continuous intravenous infusion of morphine for severe dyspnea. *Southern Medical Journal* 1991; 84: 229-234.
60. Coyne PJ, Viswanathan R, Smith TJ. Nebulized fentanyl citrate improves patients' perception of breathing, respiratory rate, and oxygen saturation in dyspnea. *Journal of pain and symptom management* 2002; 23: 157-160.
61. Currow DC, McDonald C, Oaten S, Kenny B, Allcroft P, Frith P, Briffa M, Johnson MJ, Abernethy AP. Once-daily opioids for chronic dyspnea: a dose increment and pharmacovigilance study. *Journal of pain and symptom management* 2011; 42: 388-399.
62. Gauna AA, Kang SK, Triano ML, Swatko ER, Vanston VJ. Oral transmucosal fentanyl citrate for dyspnea in terminally ill patients: An observational case series. *Journal of palliative medicine* 2008; 11: 643-648.
63. Tanaka K, Shima Y, Kakinuma R, Kubota K, Ohe Y, Hojo F, Matsumoto T, Ohmatsu H, Goto K, Nagai K, Nishiwaki Y. Effect of nebulized morphine in cancer patients with dyspnea: A pilot study. *Japanese journal of clinical oncology* 1999; 29: 600-603.
